# Supplementary material for: In vivo evidence that RBM5 is a tumour suppressor in the lung
Source: PubMed Central journal article supplement (PMC5701194; doi:10.1038/s41598-017-15874-9), 2017-11-24
Supplement: 41598_2017_15874_MOESM1_ESM.pdf [file 41598_2017_15874_MOESM1_ESM.pdf]

## ***In vivo* evidence that RBM5 is a tumour suppressor in the lung**

Duangporn Jamsai<sup>1</sup>, D. Neil Watkins<sup>2</sup>, Anne E. O'Connor<sup>1</sup>, D. Jo Merriner<sup>1</sup>, Selen Gursoy<sup>1</sup>, Anthony D. Bird<sup>3</sup>, Beena Kumar<sup>4</sup>, Alistair Miller<sup>5</sup>, Timothy J. Cole<sup>6</sup>, Brendan J. Jenkins<sup>7</sup>, Moira K. O'Bryan<sup>1,\*</sup>

### **Supplementary Table 1: Pathology report of lung samples collected at 48 weeks post-NNK injection**

| <b>Reference number</b> | <b>Genotype</b> | <b>Number of tumour nodules</b> | <b>Dimension of tumour nodules (mm)</b> | <b>Tumour type</b> |
|-------------------------|-----------------|---------------------------------|-----------------------------------------|--------------------|
| 10.199                  | WT              | 1                               | 1                                       | Adenocarcinoma     |
| 10.205                  | WT              | 2                               | 0.3-0.8                                 | Adenocarcinoma     |
| 10.206                  | WT              | 4                               | 0.5-1                                   | Adenocarcinoma     |
| 10.200                  | WT              | 6                               | 0.3-1                                   | Adenocarcinoma     |
| 10.210                  | WT              | 5                               | 1.0-4                                   | Adenocarcinoma     |
| 10.208                  | HET             | 7                               | 1-5                                     | Adenocarcinoma     |
| 10.198                  | HET             | 9                               | 2-6                                     | Adenocarcinoma     |
| 10.203                  | HET             | 9                               | 0.5-5                                   | Adenocarcinoma     |
| 10.201                  | HET             | 10                              | 0.5-3                                   | Adenocarcinoma     |
| 10.220                  | HET             | 14                              | 0.2-3                                   | Adenocarcinoma     |
| 10.221                  | HET             | 14                              | 0.5-4                                   | Adenocarcinoma     |

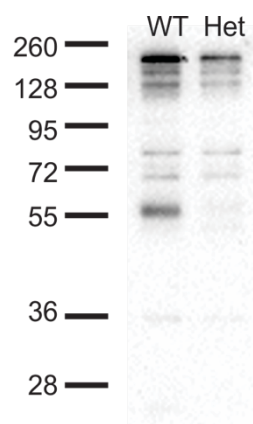

**Supplementary Figure 1:** A western blot illustrating the reduction in RBM5 protein in *Rbm5*<sup>+/-</sup> adult lung tissue compared to the corresponding *Rbm5*<sup>+/+</sup> tissue.

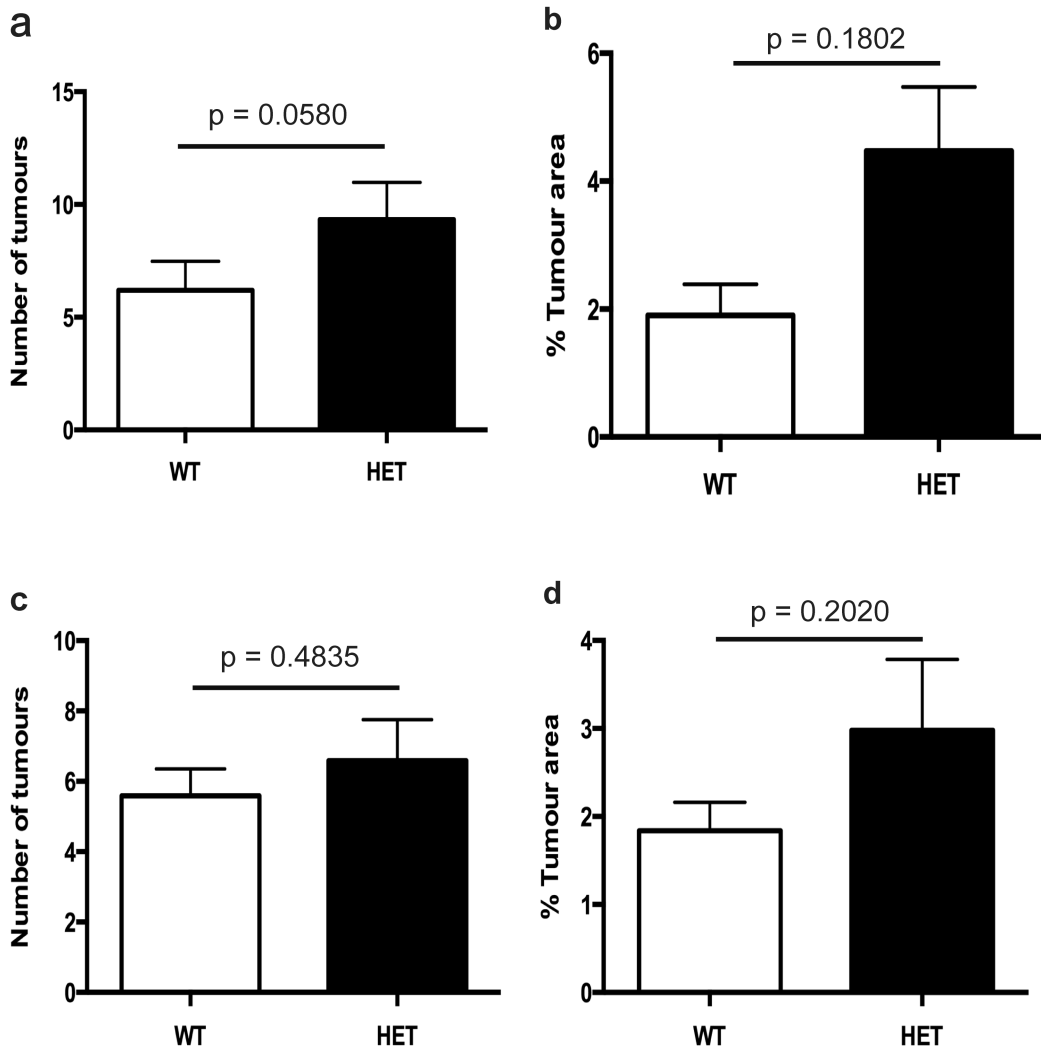

**Supplementary Figure 2: *Rbm5* is not critical for the initiation of NNK-induced lung cancer**

(A-B) Lung tumour analysis of *Rbm5*<sup>+/-</sup> (HET) and *Rbm5*<sup>+/+</sup> (WT) mice at 16 weeks post-NNK injection. n = 5 for WT and n = 6 for HET. (C-D) Lung tumour analysis of *Rbm5*<sup>+/-</sup> (HET) and *Rbm5*<sup>+/+</sup> (WT) mice at 20 weeks post-NNK injection. n = 12 for each genotype. No significant difference was observed at these two time points indicating that *Rbm5* is not critical for the formation of NNK-induced lung cancer.

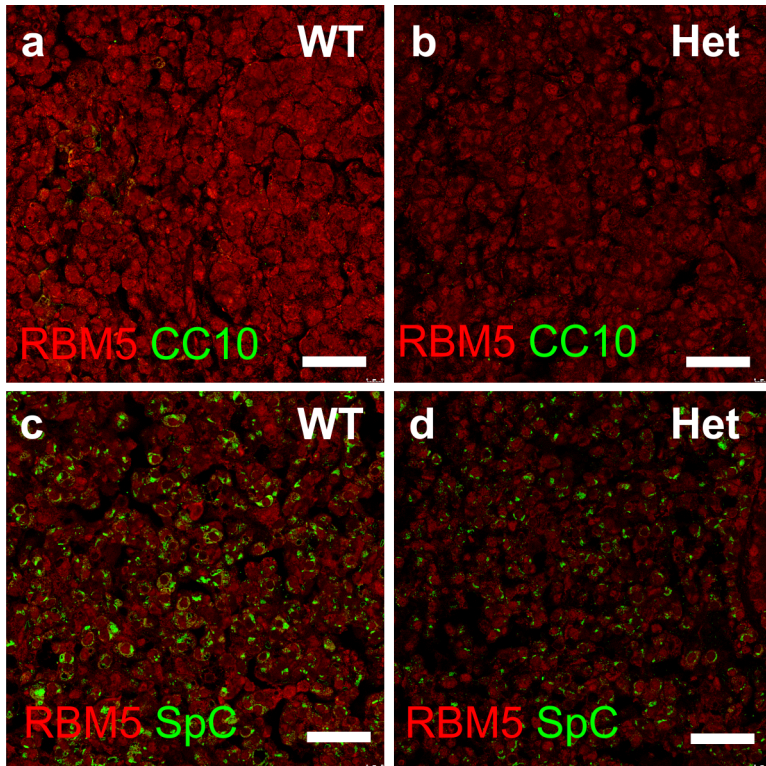

**Supplementary Figure 3:** Immunolabelling of tumour tissue within 48 weeks post-NNK injected wild type (WT) and *Rbm5*<sup>+/-</sup> (het) mice for RBM5 (red) and CC10 (green panels A-B) and Pro-SPC (SpC, green, panels C-D). Scale bar equals 50µm.
